# Supplementary material for: Morphological regulation of sulfur-vacancy-rich CdS for tunable CO2 photoreduction under visible light irradiation
Source: Royal Society of Chemistry journal article supplement (doi:10.1039/d5qi00290g), 2025-01-01

## Supplementary Information

for

### **Morphological regulation of sulfur–vacancy–rich CdS for tunable CO<sub>2</sub> photoreduction under visible irradiation**

Lu–Wen Qiu<sup>§</sup>, Wen–Ni Zhang<sup>§</sup>, Lin–Ying Wang, Hao Li, Tian–Kuan Zhang, Mi–Xin Lin, Su–Qin Ci\* and Jian Lü\*

Fujian Provincial Key Laboratory of Soil Environmental Health and Regulation, College of Resources and Environment, Fujian Agriculture and Forestry University, No. 15 Shang Xia Dian Road, Fuzhou, 350002, China

<sup>§</sup>Equal contributions.

\*Corresponding authors. E–mail: sqci@fafu.edu.cn (S.Q.C.); jian\_lu\_fafu@fafu.edu.cn (J.L.)

## Experimental

### Computational Details

The calculations were carried out using density functional theory with the PBE form of generalized gradient approximation functional (GGA).<sup>S1</sup> The Vienna ab-initio simulation package (VASP)<sup>S2–S5</sup> was employed. The plane wave energy cutoff was set as 400 eV. The Fermi scheme was employed for electron occupancy with an energy smearing of 0.1 eV. The first Brillouin zone was sampled in the Monkhorst–Pack grid.<sup>S6</sup> The 3×3×1 k-point mesh for the surface calculation. The energy (converged to  $1.0 \times 10^{-6}$  eV/atom) and force (converged to 0.01 eV/Å) were set as the convergence criterion for geometry optimization.

### Model

The model of CdS(002) is built by cutting CdS along the (002) direction according to the experimental observation. Four layers and 3×3 supercell of CdS(002) surface is obtained. To construct the CdS(002) structure with S vacancy, one surface S atom is removed. During the structural optimization calculations, all the atoms were allowed to relax. A vacuum layer as large as 25 Å was used along the c direction normal to the surface to avoid periodic interactions.

### Photoelectrochemical measurements

The photoreduction test is carried out at room temperature and pressure filled with CO<sub>2</sub>, and a 300W xenon lamp ( $\lambda \geq 400$  nm, light intensity = 400 mW/cm<sup>2</sup>) is used as the excitation light source. Specifically, 10.0 mg photocatalysts were added to the reactor, which contained 8 mL MeCN and TEA (V = 3:1). Then the reaction system was vacuum degassed and filled with CO<sub>2</sub> and repeated three times to ensure that the reactor was filled with CO<sub>2</sub>. In the process of photocatalytic reaction, 1.0 mL gas was taken every 1 h and the product was analyzed by gas chromatography.

### Reference

(S1) Perdew, J. P.; Burke, K.; Ernzerhof M. Generalized Gradient Approximation Made Simple. *Phys. Rev. Lett.* **1996**, 77, 3865–3868.

(S2) Kresse, G.; Furthmüller, J. Efficiency of Ab-initio Total Energy Calculations for Metals and Semiconductors Using a Plane-Wave Basis Set. *Comp. Mater. Sci.* **1996**, 6, 15–50.

(S3) Kresse, G.; Hafner, J. Ab initio Molecular Dynamics for Liquid Metals. *Phys. Rev. B* **1993**, 47,

558–561.

(S4) Kresse, G.; Hafner, J. Ab initio Molecular–Dynamics Simulation of the Liquid–Metal–Amorphous–Semiconductor Transition in Germanium. *Phys. Rev. B* 1994, 49, 14251–14269.

(S5) Kresse, G.; Furthmüller, J. Efficient Iterative Schemes for Ab Initio Total–Energy Calculations Using a Plane–Wave Basis Set. *Phys. Rev. B* **1996**, 54, 11169–11186.

(S6) Monkhorst, H. J.; Pack, J. D. Special Points for Brillouin–Zone Integrations. *Phys. Rev. B* **1976**, 13, 5188–5192.

**Table S1** A comparison on the CO production rates of CdS based photocatalysts.

| Photocatalyst                                                      | Sacrificial agent | CO production rate<br>( $\mu\text{mol h}^{-1} \text{g}^{-1}$ ) | Reference        |
|--------------------------------------------------------------------|-------------------|----------------------------------------------------------------|------------------|
| NG/CdS                                                             | /                 | 2.6                                                            | S7               |
| CdS/TiO <sub>2</sub>                                               | /                 | 3.6                                                            | S8               |
| CdS/FeTCPP                                                         | TEOA              | 7.2                                                            | S9               |
| Ni/CdS QDs                                                         | TEOA              | 9.5                                                            | S10              |
| ZnS/CdS/rGO                                                        | TEOA              | 9.7                                                            | S11              |
| FeOOH/CdS                                                          | /                 | 12.6                                                           | S12              |
| CdS/Ni(bpy) <sub>3</sub> Cl <sub>2</sub>                           | TEOA              | 46.9                                                           | S13              |
| CdS/Ni <sub>9</sub> S <sub>8</sub> /Al <sub>2</sub> O <sub>3</sub> | TEOA              | 121.0                                                          | S14              |
| CdS–CuS                                                            | TEOA              | 203.4                                                          | S15              |
| w–CdS                                                              | TEOA              | <b>372.8</b>                                                   | <b>This work</b> |
| r–CdS                                                              | TEOA              | <b>638.7</b>                                                   | <b>This work</b> |
| p–CdS                                                              | TEOA              | <b>4058.5</b>                                                  | <b>This work</b> |

### Reference

- (S7) Bie, C.; Zhu, B.; Xu, F. et al. In Situ Grown Monolayer N–Doped Graphene on CdS Hollow Spheres with Seamless Contact for Photocatalytic CO<sub>2</sub> Reduction. *Adv. Mater.* **2019**, 31, 1902868.
- (S8) Pan, X.; Xu, Y. J. Graphene–Templated Bottom–up Fabrication of Ultralarge Binary CdS–TiO<sub>2</sub> Nanosheets for Photocatalytic Selective Reduction. *J. Phys. Chem. C* **2015**, 119, 7184–7194.
- (S9) Li, P.; Hou, C.; Zhang, X. et al. Ethylenediamine–Functionalized CdS/tetra(4–carboxyphenyl)porphyrin Iron(III) Chloride Hybrid System for Enhanced CO<sub>2</sub> Photoreduction. *Appl. Surf. Sci.* **2018**, 459, 292–299.
- (S10) Wang, J.; Xia, T.; Wang, L. et al. Enabling Visible–Light–Driven Selective CO<sub>2</sub> Reduction by Doping Quantum Dots: Trapping Electrons and Suppressing H<sub>2</sub> Evolution. *Angew. Chem. Int. Ed.* **2018**, 57, 16447–16451.
- (S11) Xu, M.; Jiang, H.; Li, X. et al. Design of A ZnS/CdS/rGO Composite Nanosheet Photocatalyst with Multi–Interface Electron Transfer for High Conversion of CO<sub>2</sub>. *Sustain. Energ. Fuels*, **2021**, 5, 4606–4617.

(S12) Li, L.; Guo, C.; Ning, J. et al. Oxygen–Vacancy–Assisted Construction of FeOOH/CdS Heterostructure as An Efficient Bifunctional Photocatalyst for CO<sub>2</sub> Conversion and Water Oxidation. *Appl. Catal. B: Environ.* **2021**, 293, 120203.

(S13) Lin, J.; Qin, B.; Fang, Z. Nickel Bipyridine (Ni(bpy)<sub>3</sub>Cl<sub>2</sub>) Complex Used as Molecular Catalyst for Photocatalytic CO<sub>2</sub> Reduction. *Catal. Lett.* **2019**, 149, 25–33.

(S14) Li, S.; Wang, Q.; Yan, X. et al. Al<sub>2</sub>O<sub>3</sub> Support Triggering Highly Efficient Photoreduction of CO<sub>2</sub> with H<sub>2</sub>O on Noble–Metal–Free CdS/Ni<sub>9</sub>S<sub>8</sub>/Al<sub>2</sub>O<sub>3</sub>. *Appl. Catal. B: Environ.* **2019**, 240, 174–181.

(S15) Xu, J. Y.; Liu, X. J.; Huang, H. N. et al. Facile Synthesis of Compact CdS–CuS Heterostructures for Optimal CO<sub>2</sub>–to–Syngas Photoconversion. *Inorg. Chem. Front.* **2022**, 9, 2150–2160.

**Fig. S1.** (a) CdS(002) without surface S vacancy; and (b) CdS(002) with surface S vacancy.

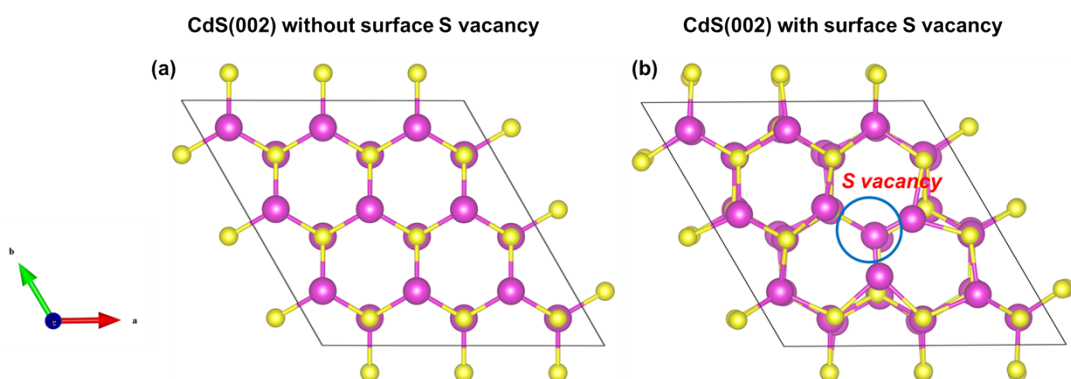

**Fig. S2.** Optimized structure diagram and charge distribution (sideview).

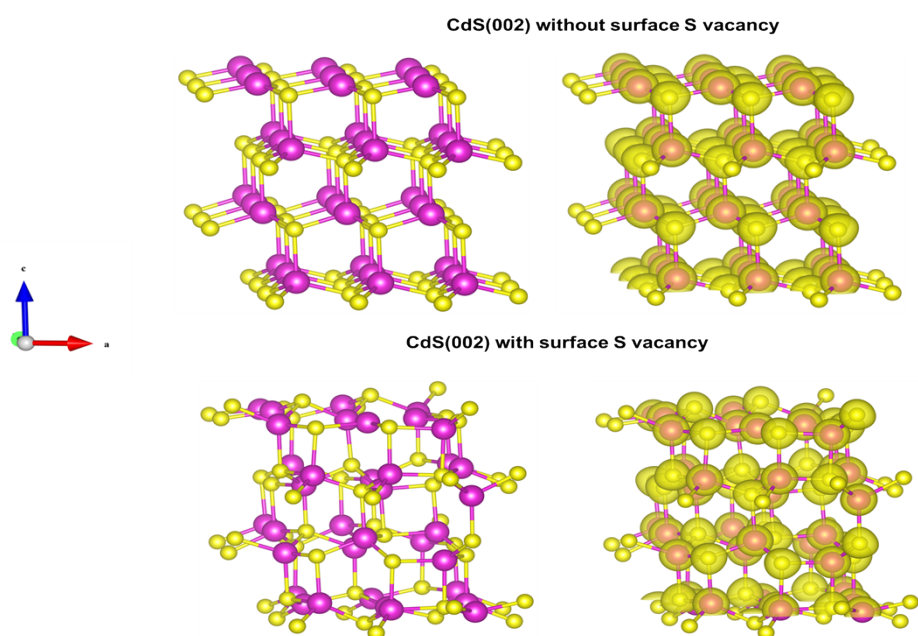

**Fig. S3.** The charge density maps of the CdS(002) without surface S vacancy (a) and CdS(002) with surface S vacancy (b). (Isosurface=0.1 e/Bohr<sup>3</sup>).

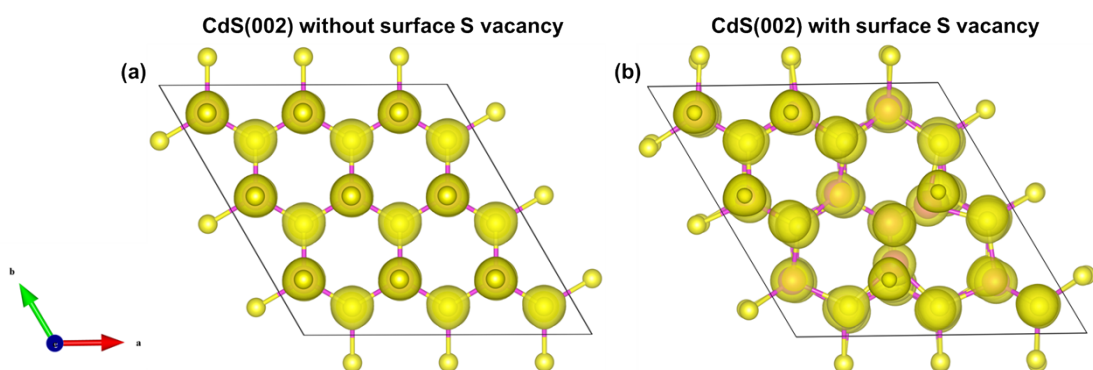

Supplement: d5qi00290g1.pdf [file d5qi00290g1.pdf]
